# Supplementary material for: Selection and community analysis of halophilic mixed exoelectrogens from salt lake soils
Source: Royal Society of Chemistry journal article supplement (doi:10.1039/c8an00809d), 2018-01-01
Supplement: c8an00809d1.pdf [file c8an00809d1.pdf]

*Supplementary Information (SI)*

## **Selection and Community Analysis of Halophiles Mixed Exoelectrogens from Salt Lake Soils**

*Zhuangzhuang Liu, Yamei Ma, Bo Tian, Chenxi Li, Yujing Jiang, Nazish Manzoor  
and Ying Liu\**

*Shaanxi Key Laboratory of Agricultural and Environmental Microbiology, College of  
Life Sciences, Northwest A&F University, Yangling, Shaanxi, P.R. China, 712100*

---

\* Corresponding author, Current address: Shaanxi Key Laboratory of Agricultural and Environmental Microbiology, College of Life Sciences, Northwest A&F University, Yangling, Shaanxi, P.R. China, 712100, E-mail: [lydiayliu@yahoo.com](mailto:lydiayliu@yahoo.com)

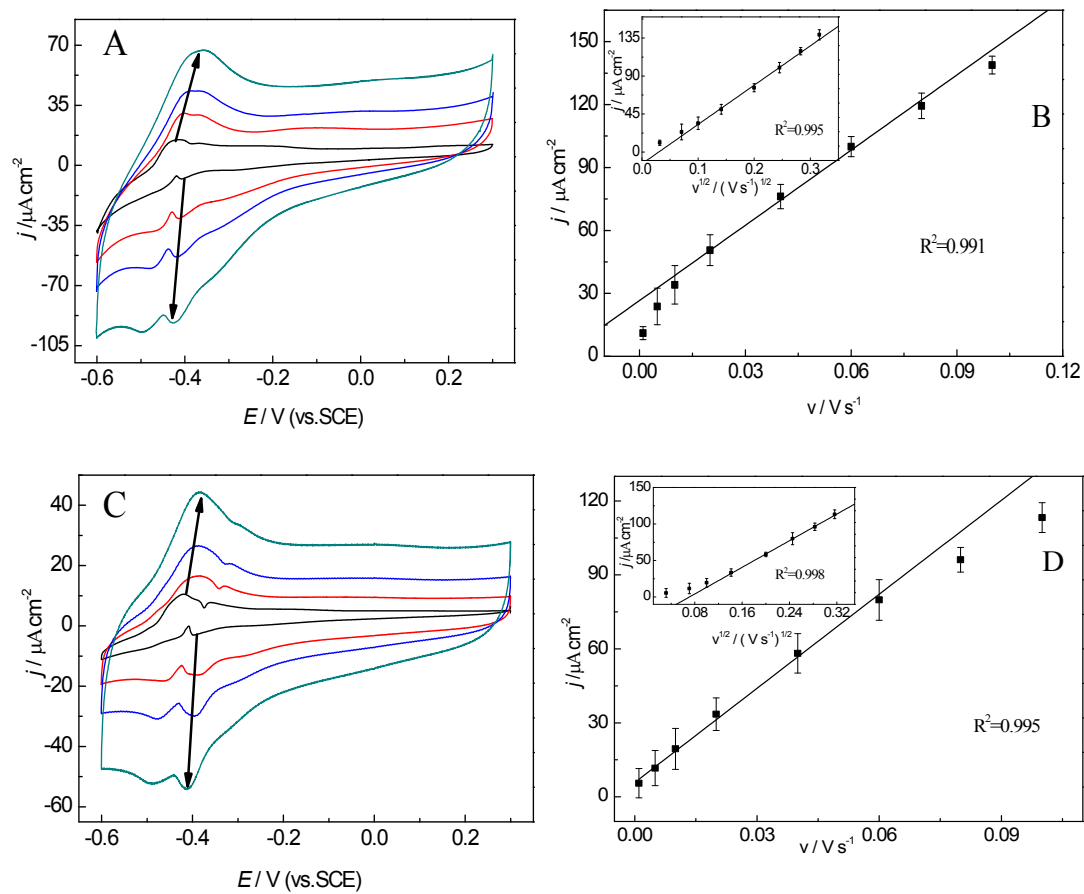

Fig. S1 Cyclic voltammograms of biofilms at different scan rates (A) ESA, (C) ESB (arrows showed representative scan rates at 1, 5, 10, 20 mV/s, respectively); Dependence of reduction current density ( $j_p$ ) versus scan rate ( $v$ ) on biofilms, (B) ESA, (D) ESB, Inset: linear dependence of  $j_p$  versus  $v^{1/2}$  on biofilms.

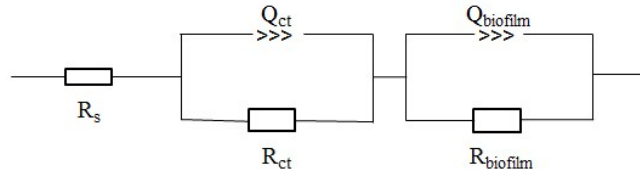

Fig. S2 Equivalent circuits for anode EIS,  $R_s$ ,  $R_{ct}$ ,  $R_{biofilm}$ , refers to solution resistance, charge transfer resistance, biofilm resistance, respectively.  $Q$  was a distributed element (known as constant phase element [CPE])

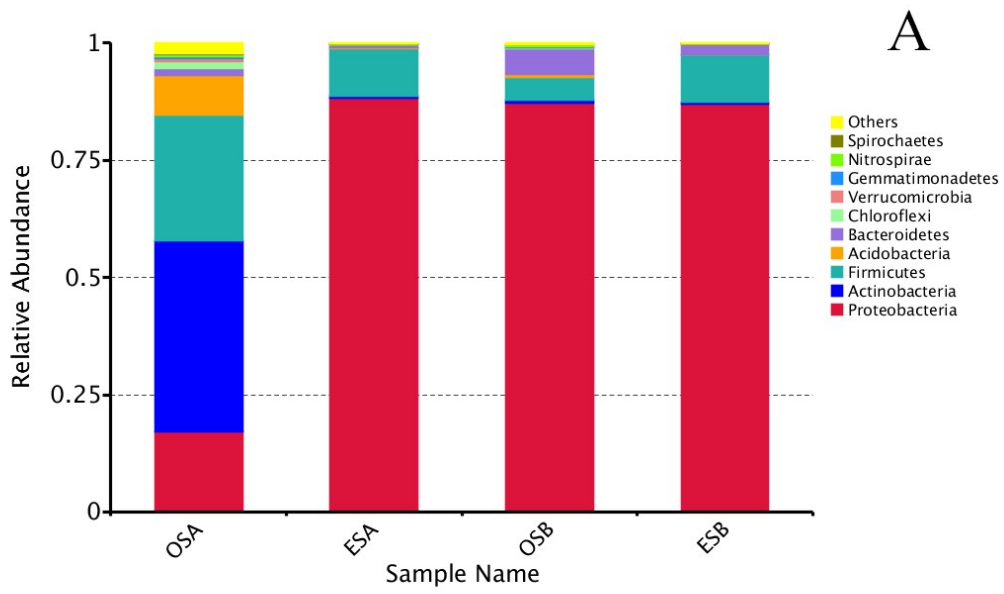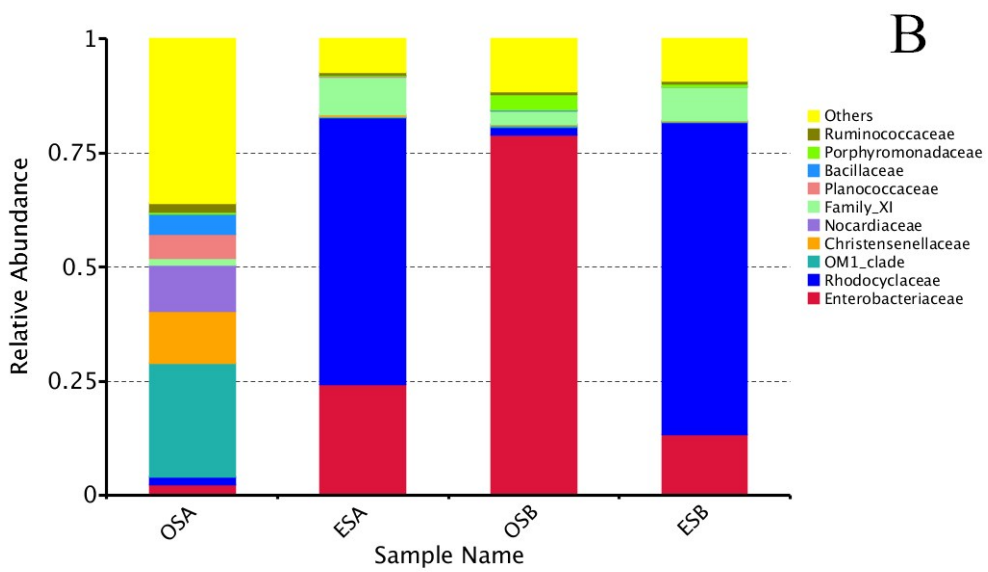

Fig. S3 Mean relative abundances of top 10 lineages (A: phylum level; B: family level) in the four samples.

Table S1 The fitting  $R_{ct}$  values of exoelectrogens with different NaCl concentrations

|                              | 0 NaCl         | 0.5% NaCl      | 1.0% NaCl      | 1.5% NaCl      |
|------------------------------|----------------|----------------|----------------|----------------|
| <i>G. sulfurreducens</i> PCA | 322.6 $\Omega$ | 168.8 $\Omega$ | 311.1 $\Omega$ | 687.3 $\Omega$ |
| ESA                          | 213.6 $\Omega$ | —              | —              | 166.6 $\Omega$ |
| ESB                          | 224.6 $\Omega$ | —              | —              | 463.2 $\Omega$ |

Table S2 Alpha diversity indices

| Sample name | observed_species | shannon | simpson | chao1 | ACE   | PD_whole_tree |
|-------------|------------------|---------|---------|-------|-------|---------------|
| OSA         | 826              | 6.0     | 0.9     | 856.4 | 853.8 | 64.9          |
| ESA         | 353              | 2.4     | 0.6     | 574.0 | 636.3 | 31.6          |
| OSB         | 478              | 2.0     | 0.4     | 525.1 | 528.5 | 38.1          |
| ESB         | 300              | 2.1     | 0.5     | 362.8 | 382.2 | 28.8          |
